# Supplementary material for: Does cognitive impairment impact adherence? A systematic review and meta-analysis of the association between cognitive impairment and medication non-adherence in stroke
Source: PLoS One. 2017 Dec 8;12(12):e0189339. doi: 10.1371/journal.pone.0189339 (PMC5722379; doi:10.1371/journal.pone.0189339)
Supplement: S3 Text — (XLS) [file pone.0189339.s005.xls]

## Sheet: Sheet1
Author	Year	Title	Publication_type	Full_text	Included	Study_design	Sample_size	Sample_description	Location	Follow_up	Outcome	data_collection	Exposure	adherence_measure	Cognition_measure	Results	Results_adjusted	RoB	Dementia	AF	pill_count	self_report	Px_claims	register	n_impaired	n_control	n_impaired_nonadherent	n_ctrl_nonadherent	n_total	OR	OR95CIlo	OR95CIhi	HR	HR95CIlo	HR95CIhi	beta_value	r_value	r_value_2	adjusted_yn	n_impaired_adherent	n_control_adherent	r_valueCIhi	r_valueCIlo	r_value2CIlo	r_value2CIhi	Fishersz1	Fishersz1SE	Fishersz2	Fishersz2SE
Björck	2015	Warfarin persistence among stroke patients with atrial fibrillation	Article	yes	yes	retrospective multicentre observational cohort study	4583, 4583	stroke patients with atrial fibrillation	Sweden	up to 5 years	Warfarin persistence, defined as ongoing treatment registered in AuriculA (Swedish national quality register for AF and oral anticoagulation), till death of patient or end of study. Any treatment discontinuation >7 days were defined as non-persistence.	data retrieved from national registries and medical records	Dementia	Non-persistence defined as treatment discontinuation or temporal suspension of >7 days	dementia diagnosis	3063 (66.8%) persistent to warfarin. Overall warfarin treatment persistence was 0.78 (95% CI 0.76-0.80) after one year, 0.69 (95% CI 0.67 to 0.71) after 2 years and 0.47 (95% CI 0.43 to 0.51) after 5 years. 45 patients with diagnosed dementia (1.0%) were more than two-times likely of discontinuation of warfarin than others (hazard ratio HR 2.22, CI 1.51-3.27). Adjusted for age, sex, stroke/TIA, h…		low	yes	yes	no	no	yes	yes	45	4538	27	1493	4583	3.0593	1.6796	5.5722	2.22	1.51	3.27				0
Coetzee	2008	Predicting Compliance With Treatment Following Stroke: A New Model of Adherence Following Rehabilitation	Article	yes	yes	observational cohort study	25	stroke patients who had completed an inpatient rehabilitation programme	Melbourne, Australia	6 weeks	medication adherence (pill coutns and self-report)		cognitive, emotional and social dysfunction	pill counts and self-report	Comprehensive Assessment of Prospective Memory, Everyday Functioning Scale, Sheffield Screening Test for Acquired Language Disorders, National Adult Reading Test	Individual predictors of regression not reported. EFQ Partner Language Skills and adherence r=-.44 (p<.001). EFQ Patient Memory and adherence r=.-54 (p<.001). EFQ Patient Planning and Organisation r=-.52 (p<.001). Associations between other cognitive measures and adherence not reported (probably not statistically significant?)		high	no	no	yes	yes	no	no						10.248	2.154	49.029					-0.54	-0.52	0			-0.184	-0.77	-0.759	-0.1572	-0.604	0.2133	-0.576	0.2133
Gumbinger	2015	Reasons underlying non-adherence to and discontinuation of anticoagulation in secondary stroke prevention among patients with atrial fibrillation	Article	yes	yes	prosoective observational single-center cohort study	139,	consecutive patients with acute ischemic stroke or TIA and AF, with a first or continued recommendation of OAC, admitted to a neurological department	Heidelberg, Germany	15 months	non-adherence to anticoagulation	semi-structured interview using a standardised questionnaire documenting present and former use of oral anticoagulants, indication for OAC therapy, basic vascular risk factors and 10 most recent INR values.	dementia diagnosis	Nonuse of OAC was documented if patients were not using OAC at follow-up and if there was no intention for restarting treatment. Reasons for nonuse were inquired and primary care physician contacted to obtain additional information.	dementia diagnosis (as stated by the patient, the PCP, or the relatives)	85 (61%) treated with OAC at follow-up. 17 (12%) were diagnosed with dementia. Univariate predictor of nonadherence to OAC: dementia OR 35.4 (4.52, >100), p<.0001	Adjusted for sex, living in nursing home, initiation (in hospital vs after hospital): dementia diagnosis OR 18.01 (2.11, 153.25), p=0.0005. However, 9 of the 17 patients with dementia were never started on OAC despite recommendation - interviews with PCPs confirmed that dementia was a reason for not prescribing OAC in these 9 patients. In addition, a further 3 patients were discontinued on OAC (P…	medium	yes	yes	no	yes	no	no	17	122	16	23	139	18.01	2.11	153.25							1	1	106
O'Carroll	2011	Predictors of Adherence to Secondary Preventive Medication in Stroke Patients	Article	yes	yes	prospective cohort	180	first-time ischaemic stroke patients approx 1 year post-stroke	Edinburgh, Scotland	5-6 weeks	medication adherence	questionnaire, interview and assessment. Urine sample	cognitive impairment (MMSE)	medication adherence report scale (suboptimal adherence = score of 23 and under) and urinary salicylate levels	MMSE	Cross-sectional - MMSE score significantly associated with medication adherence score (?=0.201, p=0.010), controlling for age, sex, stroke severity, and a number of illness perceptions and belief about medications variables, emotional distress, social deprivation index, perception of risk of further stroke	In order to test the ability of the model to predict future medication adherence, the participants again completed the MARS adherence scale, 5-6 weeks following baseline assessment. In the same model, MMSE was no longer significant (?=0.000).	medium	no	no	no	yes	no	no						1	0.589	1.698				0.005			1
White	2010	Self-Rating of Health and Adherence to Secondary Stroke Prevention Medications in the Secondary Prevention of Small Subcortical Strokes Trial	Abstract	no	yes	multicentre international RCT	526, 471 (year 2), 323 (year 3)	lacunar stroke patients (patients active on both study arms were included in the analysis)	US	3 years	medication adherence	unclear (interview and clinical assessment?)	cognitive status at baseline	pill counts and self-report (adherence scores dichotomised as good >=80% or poor <80%)	CASI	baseline CASI and compliance at 1 year: OR 1.001 (0.981 to 1.021, p=0.9320. baseline CASI and compliance at year 2: OR 0.988 (0.960 to 1.016), p=0.3974. basline CASI and compliance at year 3: OR 0.979 (0.933 to 1.028), p=0.4032). Adjusted for age, sex, marital status, employment status, number of medications, self-rated health, functional status, missed visits during the previous year.	adjusted for age, gender, education, ethnicity, employment status, smoking status, alcohol use, exercise, BMI, marital status, living arrangements, health rating, number of medications, Rankin, Barthel, at least one missed visit during the previous year. At year 1, only male gender, at least one missed visit during the previous year and annual self-rating of health were independently associated w…	medium	no	no	yes	yes	no	no					323	1.021	0.973	1.071							1
Wawruch a	2016a	Factors Influencing Non-Persistence with Antiplatelet Medications in Elderly Patients After Ischaemic Stroke	Article	yes	yes	retrospective cohort study	4319	patients (aged >=65) with a first stroke diagnosis in whom antiplatelet therapy was initiated for the first time following diagnosis. In these patients, no prescription of antiplatelet medication was recorded during the 12-month period before the first prescription of such therapy related to the stroke diagnosis. Excluded those who had experienced recurrent stroke during the follow-up period	Slovakia	3 years	antiplatelet medication persistence	health insurance provider database	dementia	persistence, measured as the time period between the initiation date and the beginning of the treatement gap, if such a gap occurred. A treatment gap was defined as a 6-month period without antiplatelet medication prescription observed after the estimated date of the last day of treatment covered by the last package of prescribed medication. The duration of treatment for each prescription was asc…	diagnosis of dementia	During the first year, second and third years of the follow-up period, 11.2, 7.5 and 8.7% of patients, respectively, were found to be non-persistent. After the third year of the follow-up period, 1184 (27.4%) patients were non-persistent with antiplatelet medication. In multivariate analysis, dementia appeared as a factor significantly decreasing the patient's probability for non-persistence (HR …		medium	yes	no	no	no	yes	no	694	3625	124	1060	4319	0.5264	0.428	0.6475	0.69	0.57	0.83				0	570	3501
Shah	2016	Low use of oral anticoagulation prescribing for secondary stroke prevention. Results from the Ontario Stroke Registry.	Article	yes	yes	retrospective cohort study using linked Ontario Stroke registry and prescription claims data	5781	consecutive patients with atrial fibrillation and ischemic stroke/TIA admitted to 11 stroke centres in Ontario, Canada	Ontario, Canada	12 months	prescription of oral anticoagulation at discharge		dementia	defined as the number of days a patient had a medication available during the year divided by 365 days. Low adherence defined as a proportion of days covered PDC<0.40 and high adherence defined as PDC>0.80	dementia diagnosis	73.3% were prescribed oral anticoagulation, 14% antiplatelet therapy, and 13% no antithrombotic therapy at discharge. Compared with those prescribed oral anticoagulant therapy, those who did not were more likely to have a history of dementia (14.6% vs 8.9%, p<0.001). aRR for dementia and OAC prescription at discharge 0.912 (0.856-0.973) and within 3 months of discharge (cohort aged >=65 years) aR…	aOR for predictors of low adherence (PDC<0.4) dementia 1.26 (0.77 to 2.04), p=0.36. Adjusted for age, sex, stroke or TIA, income, residence, stroke severity and other comorbid conditions.	low	yes	yes	no	no	yes	no	590	5101	213	1243	5691	1.26	0.77	2.04							1	377	4888
Brewer	2015	Secondary prevention after ischaemic stroke: the ASPIRE-S study	Article	yes	yes	prospective cohort	302, 256	patients with ischemic stroke admitted to three Dublin hospitals	Dublin, Ireland	6 months	adherence	patient interview	cognitive impairment (MoCA)	medication adherence score (MARS). Patients that were unintentionally non-adherence (accidentally missed their medications) were compared with all others	MoCA	For every one unit increase in the MoCA, patients were 10% more likely to miss their medications (OR 1.10, 95% CI 1.04 to 1.17).	adjusted for age and gender OR 1.08 (1.01 to 1.15), p<.05	medium	no	no	no	yes	no	no	127	98	48	57	225	0.91	0.85	0.96							1	79	50
Wawruch b	2016b	Patient-related characteristics associated with non-persistence with statin therapy in elderly patients following an ischemic stroke	Article	yes	yes	retrospective cohort	3444	patients (aged >=65) initiated on stating therapy following diagnosis of ischaemic stroke	Slovakia	3 years	statin medication persistence (treatment gap of >= 6 months considered non-persistent)	health insurance provider database	dementia	persistence, measured as the time period between the initiation date and the beginning of the treatement gap, if such a gap occurred. A treatment gap was defined as a 6-month period without antiplatelet medication prescription observed after the estimated date of the last day of treatment covered by the last package of prescribed medication. The duration of treatment for each prescription was asc…	dementia diagnosis	During the first, second and third year of the follow-up period, 601 (21.9%), 241 (8.7%) and 250 (9.1%) patients, respectively, were found to become non-persistent. At the end of the study period, a total of 1092 (39.7%) patients were found to be non-persistent with statin therapy (of 2748 patients (exlcuding those with recurrent stroke or MI). Persistence was associated with polypharmacy (HR 0.7…	Dementia and non-persistence HR (95% CI) 0.84 (0.73-0.98), p=0.029. Adjusted for age, sex, hypertension, diabetes mellitus, hypercholesterolemia, depression, anxiety disorders, Parkinson's, epilepsy, polypharmacy >=6 drugs	medium	yes	no	no	no	yes	no	518	2926	124	968	3444	0.6366	0.5129	0.7901	0.84	0.73	0.98				0	394	2802
[truncated: 11 more columns]
